# Supplementary material
Source: PubMed Central journal article supplement (PMC10214770)
Supplement: mmc1.pdf [file mmc1.pdf]

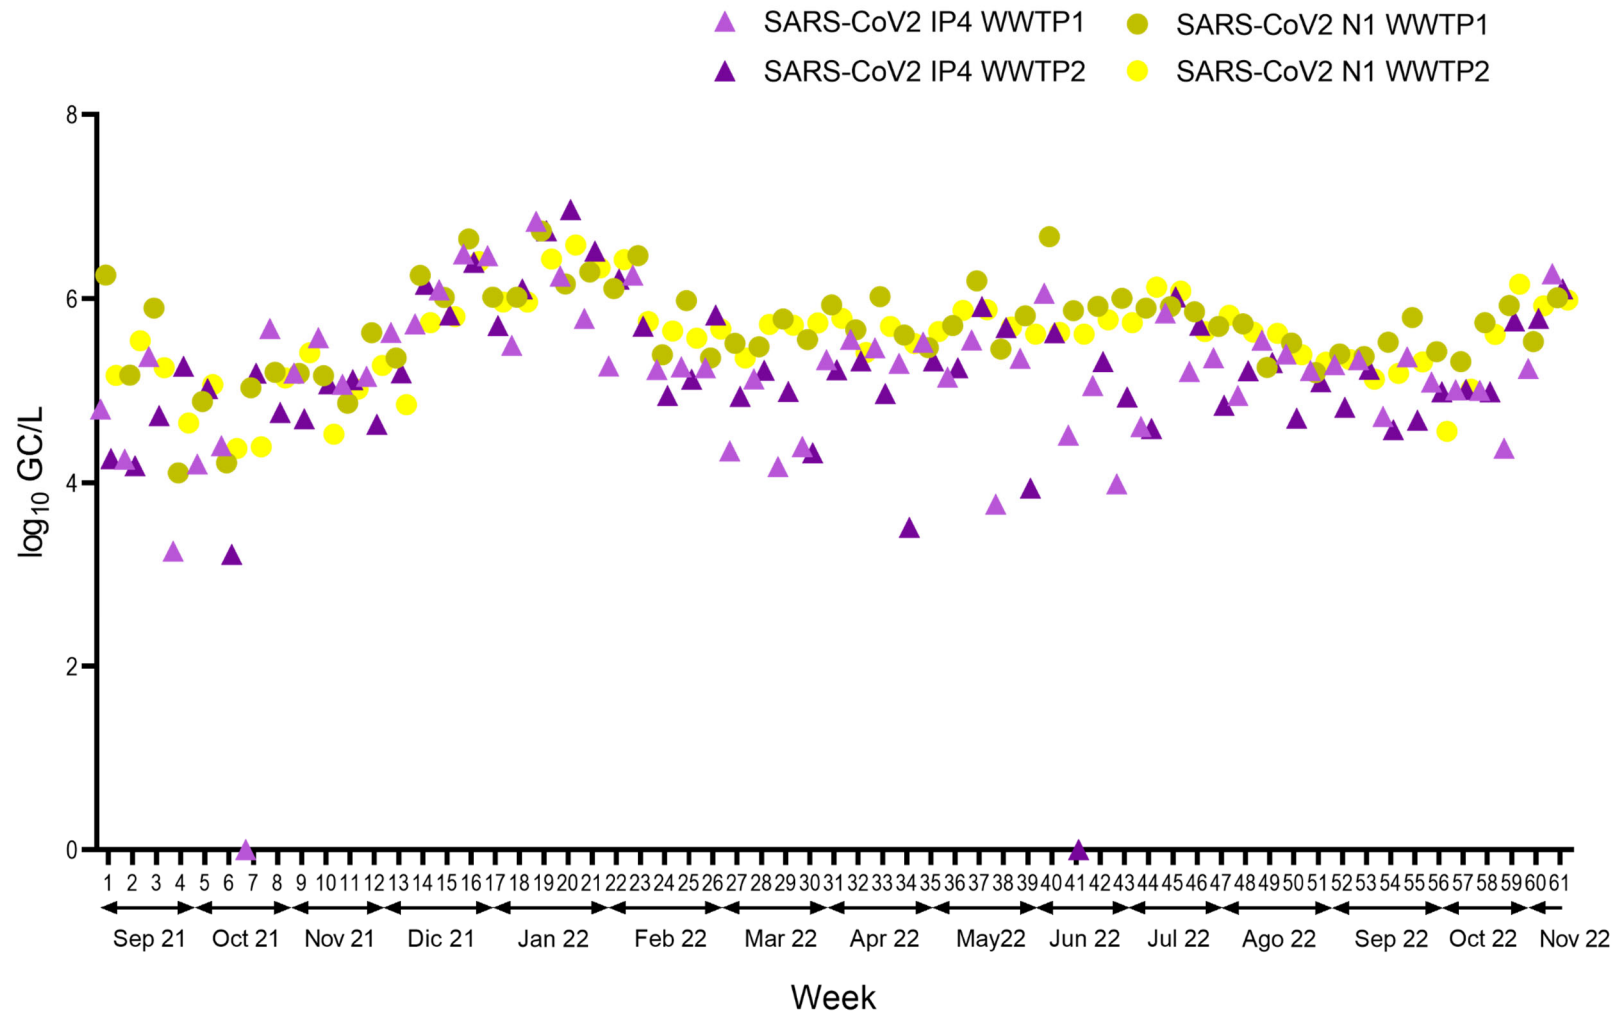

**Supplementary Figure 1-** Comparison between  $\log_{10}$ GC/L concentrations of SARS-CoV-2 IP4 and N1 genes during the sampling campaign in both WWTPs.
